# Supplementary material for: Dasatinib in Imatinib-Resistant Philadelphia Chromosome–Positive Leukemias
Source: Atypon-hosted journal article supplement (doi:10.1056/nejmoa055229), 2006-06-14
Supplement: nejm_talpaz_2531sa1.pdf [file nejm_talpaz_2531sa1.pdf]

## Supplementary Appendix

This appendix has been provided by the authors to give readers additional information about their work.

Supplement to: Talpaz M, Shah NP, Kantarjian H, et al. Dasatinib in imatinib-resistant Philadelphia chromosome-positive leukemias. *N Engl J Med* 2006;354:2531-41.

## Supplemental Table 1: Definitions of Hematologic Resistance

---

### I. Primary Resistance

#### a) Chronic phase

- 1) Fail to achieve a CHR with 400 mg/day of imatinib for at least 3 months **or**
- 2) WBC  $\geq 10,000/\text{mm}^3$  and rising on 2 consecutive measurements at least 14 days apart with at least one measurement demonstrating WBC  $> 15,000/\text{mm}^3$  while on imatinib 400 mg/day

#### b) Advanced phase

- 1) Fail to achieve a major or minor hematologic response after 3 months of imatinib treatment

### II. Acquired Resistance

#### a) Chronic phase

- 1) Achieve a CHR **and**
- 2) Develop a rising WBC  $\geq 10,000/\text{mm}^3$  and rising on 2 consecutive measurements at least 14 days apart with at least one measurement demonstrating WBC  $> 15,000/\text{mm}^3$

#### b) Advanced phase

- 1) Achieve a major or minor hematologic response with imatinib and then progress
-

## Supplemental Table 2: Hematologic Response Criteria

---

### I. Chronic Phase CML

#### a) Complete Hematologic Response (CHR)

- 1) WBC  $\leq$  institutional ULN
- 2) Platelets  $< 450,000/\text{mm}^3$
- 3) No blasts or promyelocytes in peripheral blood
- 4)  $< 5\%$  myelocytes plus metamyelocytes in peripheral blood
- 5) Basophils in peripheral blood  $< 20\%$
- 6) No extramedullary involvement (including no hepatomegaly or splenomegaly)

### II. Accelerated and Blast Phase CML and Ph+ ALL

#### a) Major Hematologic Response (Major HR)

##### 1. Complete Hematologic Response (CHR)

- 1) WBC  $\leq$  institutional ULN
- 2) ANC  $\geq 1000/\text{mm}^3$
- 3) Platelets  $\geq 100,000/\text{mm}^3$
- 4) No blasts or promyelocytes in peripheral blood
- 5) Bone marrow blasts  $\leq 5\%$
- 6)  $< 5\%$  myelocytes plus metamyelocytes in peripheral blood
- 7) Basophils in peripheral blood  $< 20\%$
- 8) No extramedullary involvement (including no hepatomegaly or splenomegaly)

##### 2. No Evidence of Leukemia (NEL)

- 1) WBC  $\leq$  institutional ULN
- 2) No blasts or promyelocytes in peripheral blood
- 3) Bone marrow blasts  $\leq 5\%$
- 4)  $< 5\%$  myelocytes plus metamyelocytes in peripheral blood
- 5) Basophils in peripheral blood  $< 20\%$
- 6) No extramedullary involvement (including no hepatomegaly or splenomegaly)
- 7) At least one of the following : (i)  $20,000/\text{mm}^3 \leq \text{Platelets} < 100,000/\text{mm}^3$ ; (ii)  $500/\text{mm}^3 \leq \text{ANC} < 1000/\text{mm}^3$

#### b) Minor Hematologic Response (Minor HR)

- 1)  $< 15\%$  blasts in bone marrow and in peripheral blood
  - 2)  $< 30\%$  blasts plus promyelocytes in bone marrow and peripheral blood
  - 3)  $< 20\%$  basophils in peripheral blood
  - 4) No extramedullary involvement other than spleen and liver
-

**Supplemental Table 3 - Summary of Dasatinib Treatment Responses, Prior Imatinib Response and Bcr/Abl Genotype in Chronic Phase Patients**

| Patient Number | Reason for imatinib discontinuation | Best Cytogenetic Response on Imatinib | Best Hematologic Response on Dasatinib | Best Cytogenetic Response on Dasatinib | Pretreatment Mutation(s)<br>(Number of Clones positive/Total Clones Examined) |
|----------------|-------------------------------------|---------------------------------------|----------------------------------------|----------------------------------------|-------------------------------------------------------------------------------|
| CP-1           | intolerant                          | CCyR                                  | CHR                                    | CCyR                                   | None                                                                          |
| CP-2           | resistant                           | partial                               | CHR                                    | CCyR                                   | F486S 2/11                                                                    |
| CP-3           | resistant                           | minor                                 | CHR                                    | CCyR                                   | G250E 3/10<br>F359C 5/10                                                      |
| CP-4           | resistant                           | partial                               | CHR                                    | CCyR                                   | M351T 11/11                                                                   |
| CP-5           | resistant                           | CCyR                                  | none                                   | none                                   | E255V 1/10                                                                    |
| CP-6           | resistant                           | none                                  | CHR                                    | none                                   | H396R 9/11<br>E355G 1/11                                                      |
| CP-7           | resistant                           | CCyR                                  | CHR                                    | CCyR                                   | E98G 11/11                                                                    |
| CP-8           | intolerant                          | partial                               | CHR                                    | none                                   | G250E 1/12<br>H396R 1/12<br>E355G 1/12<br>F486S 1/12                          |
| CP-9           | intolerant                          | partial                               | CHR                                    | CCyR                                   | None                                                                          |
| CP-10          | resistant                           | none                                  | CHR                                    | none                                   | M351T 3/11<br>F486S 3/11<br>D444G 2/11<br>E450G 1/11                          |
| CP-11          | resistant                           | minimal                               | CHR                                    | minimal                                | E255K 12/12                                                                   |
| CP-12          | resistant                           | none                                  | CHR                                    | none                                   | Y253H 4/10<br>M388L 5/10<br>M388L/M244V 1/10                                  |
| CP-13          | resistant                           | none                                  | CHR                                    | minimal                                | E355G 8/10<br>E355G/Q252R 1/10                                                |
| CP-14          | resistant                           | none                                  | CHR                                    | none                                   | L364I 9/12                                                                    |
| CP-15          | resistant                           | partial                               | CHR                                    | CCyR                                   | E450Q/M351T 1/10<br>E450Q 9/10                                                |

|       |            |         |      |         |                                                                              |
|-------|------------|---------|------|---------|------------------------------------------------------------------------------|
| CP-16 | resistant  | none    | CHR  | none    | F317L 1/12<br>V90A/S157R/Y174C/K400E<br>2/12                                 |
| CP-17 | resistant  | partial | CHR  | CCyR    | M351T 8/9<br>M351S 1/9                                                       |
| CP-18 | resistant  | none    | CHR  | none    | None                                                                         |
| CP-19 | intolerant | CCyR    | CHR  | CCyR    | L323P 2/12<br>I403V/T 1/12, 1/12<br>V379I 1/12                               |
| CP-20 | resistant  | minimal | CHR  | minimal | V289I 8/11<br>V289I/M388L 1/11<br>G250E 1/11                                 |
| CP-21 | resistant  | CCyR    | CHR  | CCyR    | Y253H 11/11                                                                  |
| CP-22 | resistant  | none    | CHR  | none    | E255V 6/10<br>E255V/Q447R 2/10<br>E255V/T345A 1/10<br>E255V/T345A/H396R 1/10 |
| CP-23 | intolerant | none    | CHR  | minimal | F359C 1/10                                                                   |
| CP-24 | resistant  | minor   | CHR  | partial | G250E 10/10                                                                  |
| CP-25 | resistant  | none    | CHR  | none    | M244V 12/12                                                                  |
| CP-26 | resistant  | none    | CHR  | none    | E255V 10/11<br>E255K 1/11                                                    |
| CP-27 | resistant  | none    | none | none    | T315I 2/10<br>F359V 6/10<br>M244V 1/10<br>G250E 1/10                         |
| CP-28 | resistant  | none    | CHR  | partial | M351T 4/10                                                                   |
| CP-29 | resistant  | partial | CHR  | CCyR    | M351T 10/10                                                                  |
| CP-30 | resistant  | none    | none | none    | S438C 6/10<br>K466E/R 1/10, 1/10                                             |
| CP-31 | resistant  | partial | CHR  | minimal | None                                                                         |
| CP-32 | intolerant | CCyR    | CHR  | CCyR    | None                                                                         |
| CP-33 | resistant  | none    | CHR  | none    | F359I 9/9                                                                    |
| CP-34 | resistant  | none    | CHR  | minimal | V186A 2/12                                                                   |

|       |            |         |     |         |                                                                  |
|-------|------------|---------|-----|---------|------------------------------------------------------------------|
| CP-35 | resistant  | none    | CHR | minimal | L387M 7/10<br>L387M / F192L 2/10<br>E450G 1/10                   |
| CP-36 | resistant  | partial | CHR | CCyR    | D363G 2/10                                                       |
| CP-37 | resistant  | none    | CHR | none    | F359V 6/10<br>F359V/F486S 1/10<br>F359V/L273M 2/10<br>L273M 1/10 |
| CP-38 | intolerant | n/a     | CHR | partial | None                                                             |
| CP-39 | intolerant | partial | CHR | CCyR    | None                                                             |
| CP-40 | resistant  | n/a     | CHR | partial | G250E 9/10<br>G250E/F317L 1/10                                   |

Mutations were detected by sequencing 10 or more independent clones as described in methods and listed only if present in at least 2 of 10 clones or if previously reported in imatinib-resistant patients. Color code: pink (reported previously in patients), brown (mutation at this position reported previously but with different amino acid substitution), aqua (not reported previously, but found in multiple clones of the same patient in this trial). Patients off study are highlighted in grey.

**Supplemental Table 4 - Summary of Dasatinib Treatment Responses and Bcr/Abl Genotype in Advanced Phase Patients**

| Patient Number | Reason for imatinib discontinuation | Best Hematologic Response on Dasatinib | Best Cytogenetic Response on Dasatinib | Pretreatment Mutations<br>Number of Clones positive/Total Clones Examined                                                      |
|----------------|-------------------------------------|----------------------------------------|----------------------------------------|--------------------------------------------------------------------------------------------------------------------------------|
| AP-1           | resistant                           | CHR                                    | none                                   | None                                                                                                                           |
| AP-2           | resistant                           | CHR                                    | none                                   | M351T 6/10<br>M351A 1/10                                                                                                       |
| AP-3           | resistant                           | none                                   | none                                   | T315I 8/10                                                                                                                     |
| AP-4           | resistant                           | CHR                                    | CCyR                                   | G250E 5/8<br>G250E/E450G 1/8<br>G250E/E453G 1/8                                                                                |
| AP-5           | intolerant                          | NEL                                    | minimal                                | Y253H 1/11                                                                                                                     |
| AP-6           | intolerant                          | NEL                                    | none                                   | None                                                                                                                           |
| AP-7           | resistant                           | CHR                                    | partial                                | None                                                                                                                           |
| AP-8           | resistant                           | none                                   | none                                   | T315I 10/10                                                                                                                    |
| AP-9           | resistant                           | NEL                                    | none                                   | E355G 6/10<br>E355G/L324Q 1/10<br>L324Q 3/10                                                                                   |
| AP-10          | resistant                           | NEL                                    | CCyR                                   | E279K 3/11<br>V379I 5/11<br>V379I/F317L/M351T 1/11                                                                             |
| AP-11          | resistant                           | CHR                                    | none                                   | G250E/E138G/I242T/K271R/V338M 3/12<br>G250E/E138G/I242T/K271R 1/12<br>G250E/I242T/K271R/V338M/N146S 1/12<br>N146S another 7/12 |
| MBC-1          | resistant                           | CHR                                    | minor                                  | None                                                                                                                           |
| MBC-2          | resistant                           | CHR                                    | none                                   | V379I 9/10                                                                                                                     |
| MBC-3          | resistant                           | CHR                                    | CCyR                                   | None                                                                                                                           |
| MBC-4          | resistant                           | none                                   | none                                   | M244V 1/11                                                                                                                     |
| MBC-5          | resistant                           | CHR                                    | CCyR                                   | M351T 10/10                                                                                                                    |
| MBC-6          | resistant                           | NEL                                    | none                                   | None                                                                                                                           |
| MBC-7          | resistant                           | CHR                                    | CCyR                                   | G250E 1/10<br>D276G 1/10                                                                                                       |
| MBC-8          | resistant                           | CHR                                    | CCyR                                   | None                                                                                                                           |

|        |            |       |         |                                                                                                       |
|--------|------------|-------|---------|-------------------------------------------------------------------------------------------------------|
| MBC-9  | resistant  | minor | minimal | G250E 11/11                                                                                           |
| MBC-10 | resistant  | minor | none    | None                                                                                                  |
| MBC-11 | resistant  | none  | none    | F486S 1/11                                                                                            |
| MBC-12 | intolerant | NEL   | none    | None                                                                                                  |
| MBC-13 | resistant  | none  | none    | F359V 1/10                                                                                            |
| MBC-14 | resistant  | minor | none    | E255V 10/12<br>E292V 2/12                                                                             |
| MBC-15 | resistant  | NEL   | CCyR    | F359V 9/12<br>F359V/Q252R 1/12<br>L273M 2/12                                                          |
| MBC-16 | resistant  | minor | minor   | None                                                                                                  |
| MBC-17 | resistant  | CHR   | CCyR    | N49S 2/11                                                                                             |
| MBC-18 | resistant  | CHR   | partial | G250E 8/11<br>G250E/S126P 2/12<br>G250E/F486S 1/12                                                    |
| MBC-19 | resistant  | NEL   | none    | M244V/L364I 5/11<br>M244V/L364I/N53S 2/11<br>M244V/L364I/M458T 1/11<br>L364I/M458T 1/11<br>L364I 2/11 |
| MBC-20 | resistant  | NEL   | minimal | None                                                                                                  |
| MBC-21 | resistant  | NEL   | partial | None                                                                                                  |
| MBC-22 | resistant  | none  | none    | F359V 9/10                                                                                            |
| MBC-23 | resistant  | none  | none    | None                                                                                                  |
| LBC-1  | resistant  | CHR   | partial | C100R 2/10<br>F486S 1/10                                                                              |
| LBC-2  | resistant  | CHR   | partial | E355G 10/10                                                                                           |
| LBC-3  | resistant  | CHR   | partial | None                                                                                                  |
| LBC-4  | resistant  | CHR   | CCyR    | None                                                                                                  |
| LBC-5  | intolerant | CHR   | CCyR    | None                                                                                                  |
| ALL-1  | resistant  | none  | partial | Y253H 3/11<br>insert RN at 293-294 8/11                                                               |
| ALL-2  | resistant  | CHR   | partial | M244V 1/11                                                                                            |
| ALL-3  | resistant  | CHR   | CCyR    | Y253H 9/10<br>Y253H/Q252R 1/10                                                                        |
| ALL-4  | resistant  | none  | none    | E255K 3/12                                                                                            |
| ALL-5  | resistant  | NEL   | minor   | None                                                                                                  |

Mutations were detected by sequencing 10 or more independent clones as described in methods and listed only if present in at least 2 of 10 clones or if previously reported in imatinib-resistant patients. Color code: pink (reported previously in patients), brown (mutation at this position reported previously but with different amino acid substitution), aqua (not reported previously, but found in multiple clones of the same patient in this trial). Patients off study are highlighted in grey.

**Supplemental Table 5: Baseline Hematologic Parameters Prior to Dasatinib Treatment**

|           | Grade 3 |        |        |               | Grade 4 |        |        |               |
|-----------|---------|--------|--------|---------------|---------|--------|--------|---------------|
|           | CP      | AP     | MBC    | LBC/Ph+       | CP      | AP-CML | MBC    | LBC/Ph+       |
|           | (N=40)  | (N=11) | (N=23) | ALL<br>(N=10) | (N=40)  | (N=11) | (N=23) | ALL<br>(N=10) |
| ANC       | 0       | 1 (9)  | 3 (13) | 1 (10)        | 0       | 1 (9)  | 4 (17) | 1 (10)        |
| Platelets | 0       | 1 (9)  | 7 (30) | 5 (50)        | 0       | 2 (18) | 7 (30) | 2 (20)        |
| Hgb       | 2 (5)   | 0      | 6 (26) | 0             | 1 (3)   | 0      | 0      | 0             |

**Supplemental Table 6: Dose Modifications**

|               | <b>CP CML</b> | <b>AP CML</b> | <b>MBC-CML</b> | <b>LBC-CML/</b> | <b>Total</b> |
|---------------|---------------|---------------|----------------|-----------------|--------------|
|               | <b>N=40</b>   | <b>n=11</b>   | <b>n=23</b>    | <b>ALL n=10</b> | <b>N=84</b>  |
| Interruptions | 29 (73)       | 7 (64)        | 12 (52)        | 3 (30)          | 53 (63)      |
| Reductions    | 12 (30)       | 3 (27)        | 5 (22)         | 1 (10)          | 21 (25)      |
| Escalations   | 18 (45)       | 1 (9)         | 2 (9)          | 1 (10)          | 20 (24)      |

**Supplemental Table 7: Laboratory Abnormalities Regardless of Relationship to Treatment**

|                          | Grade 1-4    |              |               |               | Grade 3-4    |              |               |               |
|--------------------------|--------------|--------------|---------------|---------------|--------------|--------------|---------------|---------------|
|                          |              |              | LBC/          |               |              |              | LBC/          |               |
|                          | CP<br>(N=40) | AP<br>(N=11) | MBC<br>(N=23) | ALL<br>(N=10) | CP<br>(N=40) | AP<br>(N=11) | MBC<br>(N=23) | ALL<br>(N=10) |
| Elevated AST             | 23 (56)      | 7 (64)       | 13 (57)       | 9 (90)        | 1 (3)        | 0            | 2 (9)         | 0             |
| Elevated ALT             | 15 (38)      | 8 (73)       | 13 (57)       | 7 (70)        | 0            | 1 (9)        | 2 (9)         | 0             |
| Elevated Total bilirubin | 3 (8)        | 2 (18)       | 10 (43)       | 5 (50)        | 1 (3)        | 0            | 4 (17)        | 0             |
| Elevated creatinine      | 14 (35)      | 2 (18)       | 12 (52)       | 6 (60)        | 0            | 0            | 0             | 0             |
| Hypocalcemia             | 26 (65)      | 8 (73)       | 21 (91)       | 7 (70)        | 3 (8)        | 2 (18)       | 6 (26)        | 3 (30)        |
| Hypomagnesemia           | 13 (33)      | 5 (45)       | 26 (70)       | 3 (30)        | 1 (3)        | 0            | 1 (4)         | 0             |

**Supplemental Table 8: Dose at Time of Response**

| Starting Dose Level                     | CHR/MHR                               |                                       | MCyR                                  |                                       |
|-----------------------------------------|---------------------------------------|---------------------------------------|---------------------------------------|---------------------------------------|
|                                         | Number of Responses at Starting Dose* | Number of Responses at Escalated Dose | Number of Responses at Starting Dose* | Number of Responses at Escalated Dose |
| <b>Chronic Phase QD Dosing (N=21)</b>   |                                       |                                       |                                       |                                       |
| 15 mg QD                                | 1/3                                   | 2/2                                   | 0                                     | 3/3                                   |
| 30 mg QD                                | 1/3                                   | 1/2                                   | 0                                     | 1/3                                   |
| 50 mg QD                                | 3/3                                   | -                                     | 2/3                                   | 0/3                                   |
| 75 mg QD                                | 1/3                                   | 2/2                                   | 0/3                                   | 0/3                                   |
| 105 mg QD                               | 2/3                                   | 1/1                                   | 1/3                                   | 0/2                                   |
| 140 mg QD                               | 3/3                                   | -                                     | 1/3                                   | 0/2                                   |
| 180 mg QD                               | 3/3                                   | -                                     | 2/3                                   | -                                     |
| <b>Chronic Phase BID Dosing (N=19)</b>  |                                       |                                       |                                       |                                       |
| 25 mg BID                               | 2/3                                   | 1/1                                   | 0                                     | 1/3                                   |
| 35 mg BID                               | 5/7                                   | 0/2                                   | 1/7                                   | 1/6                                   |
| 50 mg BID                               | 3/3                                   | -                                     | 1/3                                   | -                                     |
| 70 mg BID                               | 6/6                                   | -                                     | 4/6                                   | -                                     |
| <b>Advanced Phase BID Dosing (N=44)</b> |                                       |                                       |                                       |                                       |
| 35 mg BID                               | 1/1                                   | -                                     | 1/1                                   | -                                     |
| 50 mg BID                               | 5/8                                   | -                                     | 2/8                                   | -                                     |
| 70 mg BID                               | 15/17                                 | -                                     | 10/17                                 | -                                     |
| 90 mg BID                               | 7/11                                  | -                                     | 5/11                                  | -                                     |
| 120 mg BID                              | 3/7                                   | -                                     | 1/7                                   | -                                     |

\* Nine patients who were reduced below their starting dose were counted as responding at the initial starting dose (includes 2 chronic QD, 1 chronic BID, and 1 advanced phase patient for CHR/MHR and 1 chronic QD and 4 advanced phase patients for MCyR)
